# Supplementary material for: Improvement of growth and bacoside production in Bacopa monnieri through induced autotetraploidy with colchicine
Source: PeerJ. 2019 Oct 25;7:e7966. doi: 10.7717/peerj.7966 (PMC6816379; doi:10.7717/peerj.7966)
Supplement: Supplemental Information 1 [file peerj-07-7966-s001.xlsx]

## Sheet: No. of regenerant
		No of regenerated shoot per node
		Time of Treatment (h)	Colchicine (% w/v)	Node number
				1	2	3	4	5	6	7	8	Total	Mean	SD
		24 h	0	18	15	7	9	11	13	12	12	97	12.125	3.39905
			0.025	31	32	20	23	30	20	4	16	176	22	9.36559
			0.05	13	11	8	13	15	13	16	23	112	14	4.37526
			0.075	25	21	22	17	13	8	19	24	149	18.625	5.7802
			0.1	21	14	15	23	10	13	13	11	120	15	4.6291
			0.5	8	27	4	7	19	21	7	22	115	14.375	8.78208
		48 h	0	9	10	5	12	8	8	23	6	81	10.125	5.64263
			0.025	15	23	16	20	21	16	20	20	151	18.875	2.85044
			0.05	20	41	23	11	11	16	11	10	143	17.875	10.5077
			0.075	6	21	16	15	18	13	10	9	108	13.5	4.98569
			0.1	14	12	13	10	16	8	16	10	99	12.375	2.92465
			0.5	14	20	12	6	12	9	8	8	89	11.125	4.45413

## Sheet: Growth of selected
	clone	plant no.	FW (g)	DW (g)	Height (cm)
	2X	1	0.577	0.0397	14.1
		2	0.5473	0.0374	13.9
		3	0.4984	0.0353	14
		4	0.5008	0.0353	15.1
		6	0.5685	0.0368	14.1
	4x-1	1	0.5804	0.0259	10.8
		2	0.7279	0.0325	10.5
		3	0.7775	0.0412	12.1
		4	0.7296	0.0349	11.1
		5	0.6109	0.028	10.8
	4x-2	1	1.1478	0.0513	13.1
		2	1.0255	0.0483	11
		3	0.9069	0.0434	14.2
		4	1.0758	0.0452	13.8
		5	1.0358	0.0478	12.57
	4X-5	1	0.9327	0.0396	15.3
		2	1.0635	0.0512	18.5
		3	1.1404	0.0523	17
		4	1.2349	0.0632	17.7
		5	1.6015	0.0867	22.3
	307 4x-8	1	0.4708	0.0233	7.1
		2	0.2769	0.0207	8.3
		3	0.4263	0.0234	9.2
		4	0.5704	0.0271	8.6
		5	0.365	0.0219	6.7
	246 4x-9	1	0.695	0.0381	14.2
		2	0.7688	0.0411	14.2
		3	0.7988	0.043	15.4
		4	0.7663	0.0429	13.8
		5	0.8273	0.0443	14.9
	250 4x-14	1	0.7534	0.0326	10
		2	0.8651	0.0408	10
		3	0.6779	0.0322	8.9
		4	0.8977	0.0424	10.4
		5	0.7414	0.0377	10.6
	342 4x-19	1	0.826	0.0457	16.6
		2	0.6655	0.0362	15.3
		3	0.8422	0.0443	15
		4	0.8412	0.0431	16.2
		5	1.029	0.0411	19
	339 4x-20	1	0.8211	0.0437	15.8
		2	0.7154	0.039	16.1
		3	0.7153	0.036	14
		4	0.8868	0.0394	17.8
		5	0.8816	0.0441	16.5
	35 4x-23	1	0.0725	0.0364	11.2
		2	1.2712	0.0417	13.3
		3	0.896	0.0475	11.6
		4	1.0377	0.0571	10.5
		5	1.9213	0.066	15.7
	221 4x-37	1	0.772	0.0335	12.2
		2	0.5734	0.0309	13.6
		3	0.5579	0.0289	12.7
		4	0.8932	0.0396	12.3
		5	0.7699	0.0398	15
	261 4x-40	1	0.9221	0.051	13.8
		2	1.0088	0.055	15.4
		3	1.1958	0.0679	16.8
		4	0.876	0.0491	14.2
		5	1.4808	0.0816	19.2
	234 4x-56	1	0.5717	0.0321	13.7
		2	0.3852	0.0211	12.1
		3	0.3492	0.019	11.3
		4	0.506	0.029	13.2
		5	0.7549	0.0409	16
	73 4x-59	1	1.4339	0.0473	9.5
		2	1.305	0.0547	13.3
		3	1.8526	0.0639	15
		4	1.1904	0.053	10.3
		5	1.3618	0.0484	14
	193 4x-62	1	0.9827	0.0506	17.1
		2	0.7652	0.0408	14.6
		3	0.9287	0.053	18.7
		4	1.0298	0.0569	14.2
		5	0.7443	0.0422	14.7
	278 4x-65	1	1.0121	0.0513	15
		2	0.701	0.0382	13.4
		3	0.7234	0.0373	13.5
		4	0.6882	0.0358	14
		5	0.888	0.0468	14.6
	80 4x-67	1	1.0997	0.051	13.6
		2	0.8006	0.0365	12.4
		3	1.0262	0.0485	13
		4	0.7399	0.0353	12.4
		5	1.2957	0.0585	16.3
	283 4x-73	1	0.9992	0.046	13.4
		2	0.8171	0.0419	11
		3	1.4916	0.0405	14.3
		4	1.06	0.0492	13.6
		5	0.9312	0.0488	16.8
	209 4x-82	1	0.881	0.0475	11.2
		2	0.9012	0.0446	11
		3	1.299	0.0615	14.3
		4	1.2648	0.0594	14.4
		5	1.1595	0.0567	14.2
	374 4x-87	1	0.4104	0.0228	8.5
		2	0.512	0.0291	8.5
		3	0.3805	0.0212	10.1
		4	0.5304	0.0312	9.7
		5	0.4003	0.0223	10.7
	381 4x-88	1	0.7765	0.0419	15.1
		2	0.742	0.0406	15.8
		3	0.6918	0.0375	14.1
		4	0.9146	0.0508	14.4
		5	0.9662	0.0562	18.9
	392 4x-94	1	1.2494	0.037	17.2
		2	1.1105	0.0387	12.4
		3	0.89	0.0425	14.7
		4	0.8873	0.0466	13.2
		5	1.4444	0.0512	19.5
	394 4x-96	1	0.692	0.0338	11.8
		2	0.8293	0.0413	10.4
		3	1.0428	0.0473	11.1
		4	0.3434	0.0467	9
		5	1.0899	0.0589	14.6
	396 4x-97	1	0.9942	0.0536	15.7
		2	0.9694	0.054	11.9
		3	1.0042	0.0545	14.6
		4	0.9049	0.0503	13.8
		5	1.0368	0.057	12.8
	398 4X-98	1	1.0131	0.0524	17.5
		2	1.0293	0.0541	18.9
		3	1.107	0.0595	19.8
		4	1.1555	0.0587	18.7
		5	1.044	0.0524	19.1
	400 4x-99	1	0.9185	0.0476	15.8
		2	0.6865	0.0361	18.4
		3	1.0009	0.043	19
		4	1.0537	0.0394	19.2
		5	1.2457	0.0383	19.2
	404 4x-103	1	1.506	0.0727	17.5
		2	1.384	0.0619	17
		3	1.703	0.0829	18
		4	1.2889	0.0634	17.2
		5	1.5993	0.0792	20
	433 4x-115	1	0.916	0.042	14.2
		2	0.8818	0.0389	15
		3	0.886	0.0449	14.9
		4	0.7503	0.0362	13.4
		5	0.8012	0.0399	14.2
	435 4x-117	1	0.8473	0.0402	11.9
		2	0.956	0.0467	13.5
		3	1.0314	0.0496	13.1
		4	0.9686	0.049	13.9
		5	1.0558	0.0516	13.4

## Sheet: Bacoside
			Content (%DW)						Yield (mg/plant)
	Clone	Plant no.	Bacoside A	Bacopaside II	Bacopaside X	Bacopasaponin C	Total		Bacoside A	Bacopaside II	Bacopaside X	Bacopasaponin C	Total
	2X	1	0.94737	3.21808	0.800106	3.39232	8.35788		0.376106	1.27758	0.317642	1.34675	3.31808
		2	1.02957	3.00647	0.948961	3.30296	8.28796		0.385058	1.12442	0.354911	1.23531	3.0997
		3	0.600881	1.71305	0.331267	1.92743	4.57263		0.221124	0.630403	0.121906	0.709294	1.68273
	4X-9	1	0.376728	1.76938	1.83921	0.695877	4.6812		0.161993	0.760835	0.790861	0.299227	2.01292
		2	0.654139	3.09935	3.17808	1.42099	8.35257		0.280626	1.32962	1.3634	0.609606	3.58325
		3	0.397402	1.59366	1.85228	0.889312	4.73265		0.176049	0.70599	0.82056	0.393965	2.09656
	4X-19	1	0.634397	3.01101	0	2.71131	6.35671		0.28992	1.37603	0	1.23907	2.90502
		2	0.736651	3.41127	0	3.21909	7.36701		0.326336	1.51119	0	1.42606	3.26359
		3	0.344926	1.65602	0	1.47006	3.471		0.148663	0.713743	0	0.633597	1.496
	4X-20	1	0.162259	0.940589	0.98508	0.619076	2.707		0.070907	0.411037	0.43048	0.270536	1.18296
		2	0.263391	1.64694	1.94816	1.47979	5.33828		0.103776	0.648896	0.767574	0.583037	2.10328
		3	0.173814	1.31236	1.49989	1.14526	4.13133		0.0766521	0.578752	0.661452	0.505059	1.82191
	4X-23	1	0.866816	4.09349	0	4.20663	9.16694		0.411737	1.94441	0	1.99815	4.3543
		2	0.86979	3.81356	0	3.3994	8.08275		0.49665	2.17754	0	1.94106	4.61525
		3	0.581747	2.29372	0	2.50952	5.38498		0.383953	1.51385	0	1.65628	3.55409
	4X-40	1	0.319892	1.42797	1.59721	0.605513	3.95059		0.175941	0.785386	0.878468	0.333032	2.17283
		2	0.185919	1.00566	1.17193	0.431507	2.79501		0.126239	0.682843	0.795739	0.292993	1.89781
		3	0.314699	1.5955	1.78543	0.785116	4.48074		0.256795	1.30193	1.45691	0.640654	3.65629
	4X-56	1	0.56895	2.57119	2.89717	1.36001	7.39731		0.182633	0.825351	0.929992	0.436562	2.37454
		2	0.259605	1.15589	1.36148	0.661505	3.43849		0.0752854	0.335209	0.39483	0.191836	0.997161
		3	0.411687	1.9815	2.23344	1.02594	5.65258		0.16838	0.810434	0.913479	0.419611	2.3119
	4X-59	1	1.45737	6.10588	0.600006	7.50678	15.67		0.797179	3.33992	0.328203	4.10621	8.57151
		2	0.848442	3.50644	0.418161	4.17699	8.95003		0.542154	2.24061	0.267205	2.6691	5.71907
		3	0.758915	3.00781	0.472137	3.91176	8.15062		0.402225	1.59414	0.250233	2.07323	4.31983
	4X-62	1	0.789942	3.54177	0	3.58713	7.91885		0.399711	1.79214	0	1.81509	4.00694
		2	0.832648	3.62715	0	3.0705	7.5303		0.441303	1.92239	0	1.62737	3.99106
		3	0.393129	1.79621	0	1.48917	3.67851		0.223691	1.02204	0	0.847336	2.09307
	4X-88	1	0.439961	1.71483	1.69374	0.848017	4.69655		0.184344	0.718513	0.709677	0.355319	1.96785
		2	0.362838	1.54769	1.60563	0.8002	4.31635		0.184322	0.786225	0.815659	0.406502	2.19271
		3	0.304957	1.47264	1.40328	0.627235	3.80811		0.171386	0.827624	0.788643	0.352506	2.14016
	4X-94	1	0.767818	3.31765	0	3.57499	7.66045		0.326323	1.41	0	1.51937	3.25569
		2	0.763296	4.25635	0	4.55434	9.57398		0.355696	1.98346	0	2.12232	4.46148
		3	0.336008	1.66124	0	1.61974	3.61698		0.172036	0.850553	0	0.829306	1.8519
	4X-98	1	0.159134	1.06211	1.05607	0.474494	2.7518		0.0860914	0.574599	0.571331	0.256701	1.48872
		2	0.399281	2.61407	2.53955	1.27618	6.82907		0.237572	1.55537	1.51103	0.759325	4.0633
		3	0.202668	1.31071	1.20209	0.596589	3.31205		0.118966	0.769387	0.705624	0.350198	1.94417
	4X-99	1	0.742129	3.51591	0	1.93514	6.19317		0.353253	1.67357	0	0.921125	2.94795
		2	0.681136	3.23919	0	1.855	5.77533		0.292889	1.39285	0	0.797652	2.48339
		3	0.309749	1.61662	0	0.82947	2.75584		0.122041	0.636947	0	0.326811	1.0858
	4X-103	1	0.662213	3.55844	0	3.32483	7.54548		0.481429	2.58698	0	2.41715	5.48557
		2	0.592164	2.93554	0	2.56752	6.09522		0.490904	2.43357	0	2.12847	5.05294
		3	0.2781	1.64548	0	1.45029	3.37387		0.220256	1.30322	0	1.14863	2.67211
	4X-115	1	0.391157	2.47502	3.19876	2.32382	8.38876		0.18267	1.15584	1.49382	1.08522	3.91755
		2	0.0515368	1.17963	1.43379	0.964746	3.6297		0.0255623	0.585095	0.711158	0.478514	1.80033
		3	0.251982	1.35177	1.74992	1.27723	4.6309		0.130023	0.697513	0.90296	0.659048	2.38954
